# Supplementary material for: Use of connected digital products in clinical research following the COVID-19 pandemic: a comprehensive analysis of clinical trials
Source: PubMed Central journal article supplement — BMJ Open. 2021 Jun 22;11(6):e047341. doi: 10.1136/bmjopen-2020-047341 (PMC8228572; doi:10.1136/bmjopen-2020-047341), 2021-06-22

## **Supplementary Materials**

**(To accompany the manuscript *The use of connected digital products in clinical research following the COVID-19 pandemic: a comprehensive analysis of clinical trials*)**

### **Additional Details on Methods Used to Create and Validate Search Term Algorithm for Identification of Connected Digital Products**

Below is the complete set of the 140 search terms adapted from the list used in Marra, et al. 2020 to include additional terms related to telehealth delivery. These terms were used to identify a clinical trial as using a connected digital product (CDP). The research team used an automated algorithm to search for each term in several relevant ClinicalTrials.gov fields, such as “official title”, “brief summary”, “detailed description”, “interventions”, “study arms”, and “outcome measures.”

To confirm accuracy of the search algorithm, a random number generator was used to select 500 trials (250 from the pre-period and 250 from the post-period) for manual review. Of the 500 reviewed by the research team, 2 false positives were found, suggesting sensitivity of the search algorithm to be >99%. False positives were trials where a search term was found by the algorithm but manual review discovered that the CDP was not used to support remote monitoring or telehealth delivery. Within the 500 reviewed, there were also 4 false negatives identified, which were trials where the algorithm did not identify a CDP but manual review found one was used. This suggests algorithm specificity to be ~99%.

To alleviate incomplete data concerns arising from trial registration delays, we downloaded ClinicalTrials.gov records with trial start dates occurring between May 1, 2019 through February 28, 2021 from <https://aact.ctti-clinicaltrials.org/> on April 2, 2020, allowing 5 weeks for trial sponsors to retroactively register studies.

Search Term List:

|     |                            |     |                            |     |                                        |
|-----|----------------------------|-----|----------------------------|-----|----------------------------------------|
| 1.  | accucheck                  | 31. | exercise bracelet          | 61. | ncapp                                  |
| 2.  | actigraph                  | 32. | facebook                   | 62. | newsfeed                               |
| 3.  | activity monitor           | 33. | fall risk bracelet         | 63. | non-contact ecg                        |
| 4.  | aim covid-19 app           | 34. | fitbit                     | 64. | online class                           |
| 5.  | amazon alexa               | 35. | freestyle libre            | 65. | online coaching                        |
| 6.  | app-based practice         | 36. | gamification               | 66. | online contact                         |
| 7.  | apple watch                | 37. | garmin                     | 67. | online daily diary                     |
| 8.  | awareness bracelet         | 38. | google                     | 68. | online exercise                        |
| 9.  | biosensor                  | 39. | handheld manometer         | 69. | online fall detection system           |
| 10. | biovitals                  | 40. | hand-held spirometer       | 70. | on-line forum                          |
| 11. | brave program              | 41. | health app                 | 71. | on-line group                          |
| 12. | cct game                   | 42. | hear glue ear app          | 72. | online intervention                    |
| 13. | chat-based support         | 43. | holter monitor             | 73. | online learning                        |
| 14. | collected online           | 44. | home pulse oximeter        | 74. | online meeting                         |
| 15. | conducted entirely online  | 45. | hwa watch                  | 75. | online mindfulness intervention        |
| 16. | continuous glucose monitor | 46. | hydration sensor           | 76. | online platform                        |
| 17. | covid-19 symptom tracker   | 47. | i-neb                      | 77. | online questionnaire                   |
| 18. | dexcom                     | 48. | ICOPE App                  | 78. | online self-administered questionnaire |
| 19. | digital app                | 49. | intelligent pulse oximeter | 79. | online self-completed questionnaire    |
| 20. | digital biomarker          | 50. | internet                   | 80. | online support                         |
| 21. | digital camera             | 51. | ipad                       | 81. | online survey                          |
| 22. | digital cardiac counseling | 52. | iphone                     | 82. | online trial                           |
| 23. | digital counseling         | 53. | meditation app             | 83. | online yoga                            |
| 24. | digital data collection    | 54. | mhealth                    | 84. | phone app                              |
| 25. | digital therapeutic        | 55. | mindfulness app            | 85. | phone call                             |
| 26. | digital video camera       | 56. | minimed                    | 86. | phone interview                        |
| 27. | e-learning                 | 57. | miro                       | 87. | post online                            |
| 28. | electronic data collection | 58. | mobile app                 | 88. | qualtrics                              |
| 29. | electronic patient journal | 59. | mobile device              |     |                                        |
| 30. | electronic questionnaire   | 60. | movehero                   |     |                                        |

- |      |                                 |      |                            |
|------|---------------------------------|------|----------------------------|
| 89.  | redcap                          | 120. | video chat                 |
| 90.  | reminder bracelet               | 121. | video communication        |
| 91.  | remote assessment               | 122. | video consultation         |
| 92.  | remote consultation             | 123. | video encounters           |
| 93.  | remote mindfulness session      | 124. | video observation          |
| 94.  | remote monitoring               | 125. | videoconferencing          |
| 95.  | secure electronic ecrf          | 126. | videophone call            |
| 96.  | skype                           | 127. | virtual check-in           |
| 97.  | sleep sense                     | 128. | virtual care at home       |
| 98.  | smart bracelet                  | 129. | virtual clinic             |
| 99.  | smart care vip bracelet         | 130. | virtual group intervention |
| 100. | smartpill                       | 131. | virtual reality            |
| 101. | smart tv                        | 132. | virtual visit              |
| 102. | smartphone                      | 133. | watchpat                   |
| 103. | smartwatch                      | 134. | wearable                   |
| 104. | social media                    | 135. | web-application            |
| 105. | stop touching your face program | 136. | web based                  |
| 106. | study website                   | 137. | webex                      |
| 107. | tablet-based game               | 138. | wechat                     |
| 108. | teleconference                  | 139. | whatsapp                   |
| 109. | teleconsultation                | 140. | zoom                       |
| 110. | telehealth                      |      |                            |
| 111. | telemedicine                    |      |                            |
| 112. | telephone                       |      |                            |
| 113. | telephone coaching              |      |                            |
| 114. | telerehabilitation              |      |                            |
| 115. | text message                    |      |                            |
| 116. | thermal sensor chip             |      |                            |
| 117. | vibrolung                       |      |                            |
| 118. | video-based                     |      |                            |
| 119. | video call                      |      |                            |

### Supplemental Analysis of Trials Conducted within the United States

As a robustness check, we removed trials conducted outside of the United States because the guidance encouraging virtual trials was issued by the U.S. FDA. We determine the trial location using the “location countries” field in the ClinicalTrials.gov record. Approximately 32% (15,627/49,482) of trials started during the study period (between May 1, 2019 and February 28, 2021; March & April 2020 excluded) had a U.S. site listed, 11% had no country listed, and the remaining 57% were conducted in other countries.

Though we find a somewhat higher rate of CDP adoption among U.S. trials (between 15.7-24.3% per month), the average increase in CDP usage among U.S. trials following the pandemic onset was the same as the average seen for all trials in the sample (a 1.7 percentage point increase from pre-period to post-period) [Figure 3].

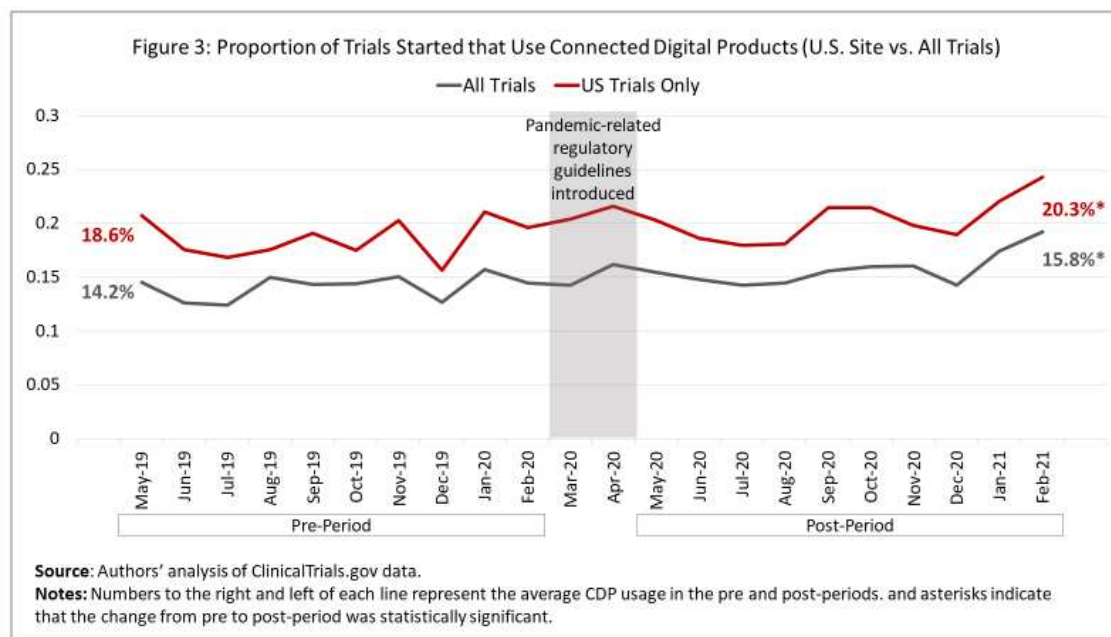

Supplement: bmjopen-2020-047341supp001.pdf [file bmjopen-2020-047341supp001.pdf]
